# Supplementary material for: Growth hormone significantly increases the adult height of children with idiopathic short stature: comparison of subgroups and benefit
Source: PubMed Central journal article supplement (PMC4114101; doi:10.1186/1687-9856-2014-15), 2014-07-16

# Kallestad vs Hybritech GH Assay (Polyclonal to monoclonal assay)

## Correlations

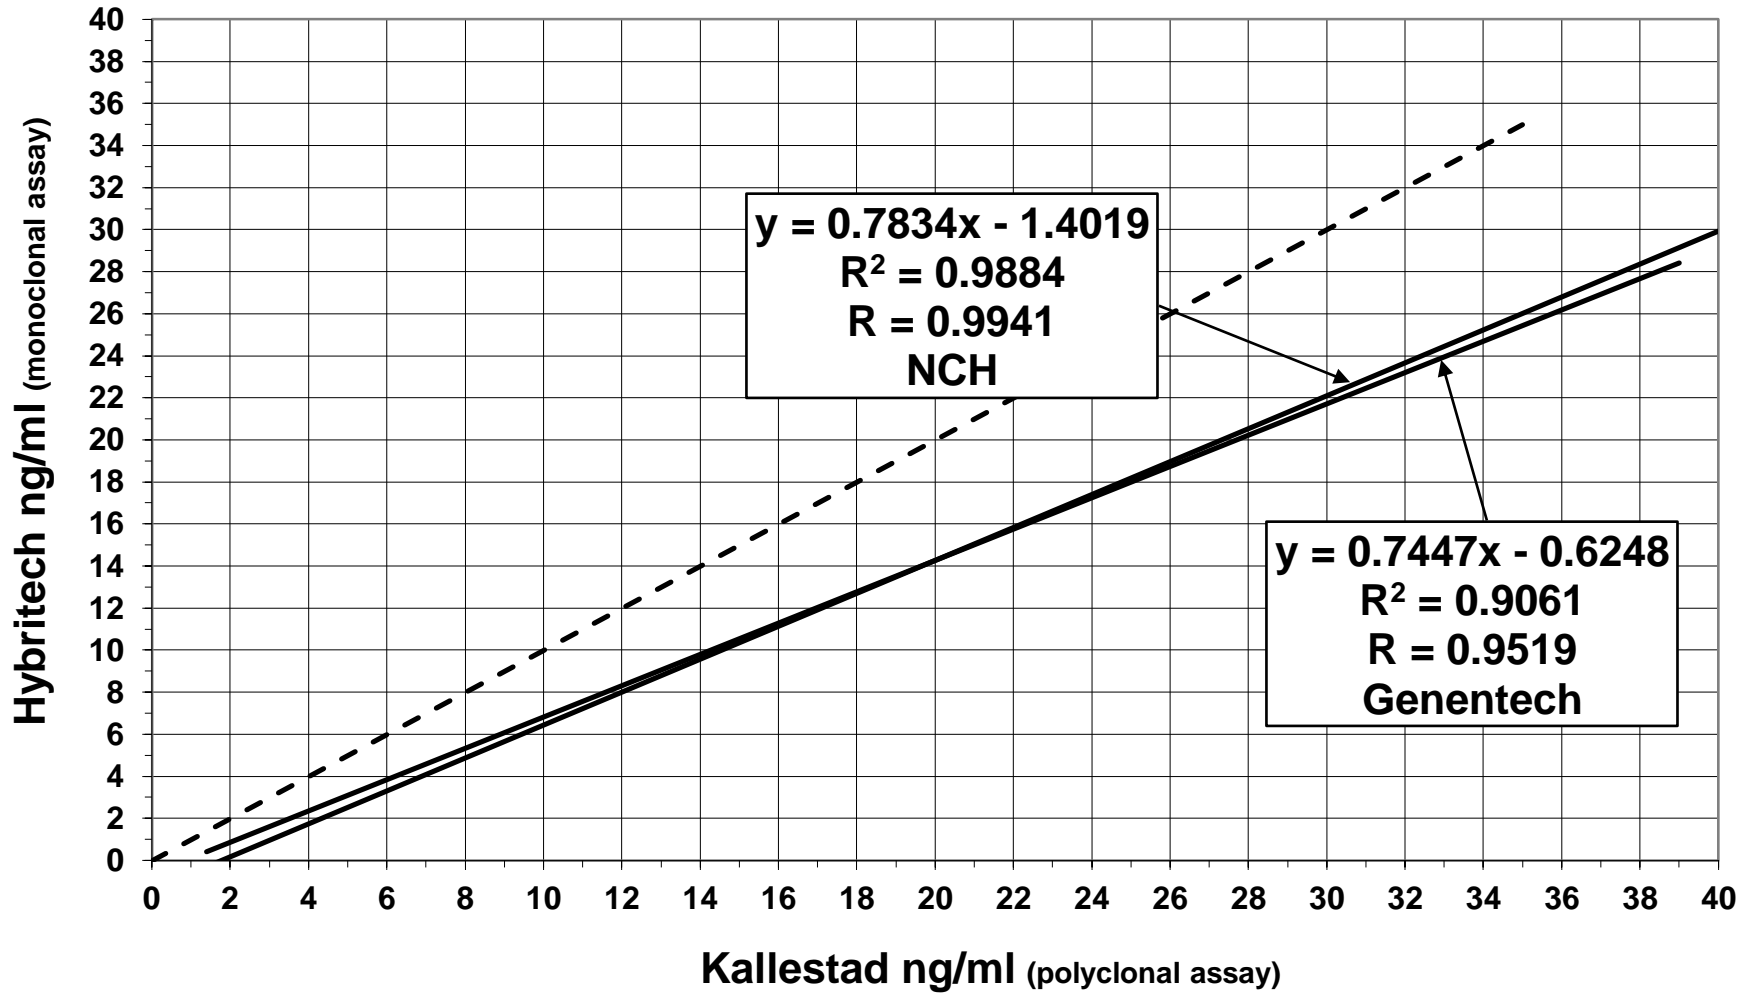

Supplement: 1687-9856-2014-15-S2.pdf [file 1687-9856-2014-15-S2.pdf]
